# Supplementary material for: Effect of Regdanvimab on Mortality in Patients Infected with SARS-CoV-2 Delta Variants: A Propensity Score-Matched Cohort Study
Source: PubMed Central journal article supplement — Infect Dis Ther. 2024 Apr 12;13(5):1037–50. doi: 10.1007/s40121-024-00971-w (PMC11098974; doi:10.1007/s40121-024-00971-w), 2024-04-12
Supplement: 40121_2024_971_MOESM1_ESM.pdf [file 40121_2024_971_MOESM1_ESM.pdf]

**Effect of regdanvimab on mortality in patients infected with SARS-CoV-2 delta variants:  
A propensity score-matched cohort study**

<sup>1</sup>Soyoon Hwang\*, <sup>2</sup>Nan Young Lee\*, <sup>1</sup>Eunkyung Nam, <sup>2</sup>Yu Kyung Kim, <sup>3</sup>Shin-Woo Kim,  
<sup>3</sup>Hyun-Ha Chang, <sup>3</sup>Yoonjung Kim, <sup>3</sup>Sohyun Bae, <sup>4</sup>Juhwan Jeong, <sup>5</sup>Jae-Ho Shin, <sup>6</sup>Guehwan  
Jang, <sup>6</sup>Changhee Lee, <sup>1</sup>Ki Tae Kwon

\* Soyoon Hwang and Nan Young Lee contributed equally to this manuscript as co-first authors.

<sup>1</sup>Division of Infectious Diseases, Department of Internal Medicine, School of Medicine, Kyungpook National University, Kyungpook National University Chilgok Hospital, Daegu, Republic of Korea

<sup>2</sup>Department of Clinical Pathology, School of Medicine, Kyungpook National University, Daegu, Republic of Korea

<sup>3</sup>Division of Infectious Diseases, Department of Internal Medicine, School of Medicine, Kyungpook National University, Kyungpook National University Hospital, Daegu, Republic of Korea

<sup>4</sup>Division of Infectious Diseases, Department of Internal Medicine, Kyungpook National University Chilgok Hospital, Daegu, Republic of Korea

<sup>5</sup>KNU NGS core facility, Kyungpook National University, Daegu, Republic of Korea

<sup>6</sup>College of Veterinary Medicine and Virus Vaccine Research Center, Gyeongsang National University, Jinju, Republic of Korea

**\*Corresponding authors:**

Ki Tae Kwon, MD, PhD, <https://orcid.org/0000-0003-4666-0672>

Department of Internal Medicine, School of Medicine, Kyungpook National University,  
Kyungpook National University Chilgok Hospital

807, Hoguk-ro, Buk-gu, Daegu, Republic of Korea

Tel: 82-53-200-2616

Fax: 82-53-200-2027

Email: ktkwon@knu.ac.kr

Changhee Lee, DVM, PhD, <https://orcid.org/0000-0002-5930-5461>

College of Veterinary Medicine and Virus Vaccine Research Center, Gyeongsang National University

501, Jinju-daero, Jinju, Gyeongsangnam-do, Republic of Korea

Email: changhee@gnu.ac.kr

Supplementary table 1. Clinical characteristics before propensity matching score

| Variable                                 | Total<br>(N = 492) | Use of<br>regdanvimab<br>(N = 262) | No use of<br>regdanvimab<br>(N = 230) | P-value |
|------------------------------------------|--------------------|------------------------------------|---------------------------------------|---------|
| Male                                     | 284(57.7%)         | 154(58.8%)                         | 130(56.5%)                            | 0.613   |
| Age                                      |                    |                                    |                                       |         |
| 50 <                                     | 178(36.2%)         | 97(27.0%)                          | 81(35.2%)                             |         |
| 50 ~ 59                                  | 90(18.3%)          | 54(20.6%)                          | 36(15.7%)                             |         |
| 60 ~ 69                                  | 123(25.0%)         | 66(25.2%)                          | 57(24.8%)                             | 0.302   |
| 70 ~ 79                                  | 66(13.4%)          | 29(11.1%)                          | 37(16.1%)                             |         |
| 80 ≥                                     | 35(7.1%)           | 16(6.1%)                           | 19(8.3%)                              |         |
| Body mass index ≥ 30 kg/m <sup>2</sup>   | 52(10.6%)          | 35(13.4%)                          | 17(7.4%)                              | 0.032   |
| Medical comorbidities                    |                    |                                    |                                       |         |
| Myocardial infarction                    | 17(3.5%)           | 10(3.8%)                           | 7(3.0%)                               | 0.639   |
| Heart failure                            | 7(1.4%)            | 2(0.9%)                            | 5(2.2%)                               | 0.260   |
| Cardiovascular disease                   | 3(0.6%)            | 3(1.1%)                            | 0(0.0%)                               | 0.252   |
| Neurovascular disease                    | 28(5.7%)           | 15(5.7%)                           | 13(5.7%)                              | 0.972   |
| Chronic obstructive<br>pulmonary disease | 5(1.0%)            | 5(1.9%)                            | 0(0.0%)                               | 0.064   |
| Connective tissue disease                | 12(2.4%)           | 8(3.1%)                            | 4(1.7%)                               | 0.346   |
| Chronic liver disease                    | 15(3.0%)           | 11(4.2%)                           | 4(1.7%)                               | 0.113   |
| Diabetes                                 | 90(18.3%)          | 58(22.1%)                          | 32(13.9%)                             | 0.019   |
| Chronic kidney disease                   | 17(3.5%)           | 10(3.8%)                           | 7(3.0%)                               | 0.639   |
| Solid tumor                              |                    |                                    |                                       |         |
| Localized                                | 48(9.8%)           | 24(9.2%)                           | 24(10.4%)                             | 0.683   |
| Metastatic                               | 9(1.8%)            | 6(2.3%)                            | 3(1.3%)                               |         |
| Vaccination status                       |                    |                                    |                                       |         |
| None                                     | 292(59.3%)         | 179(68.3%)                         | 113(49.1%)                            | P<0.001 |
| One dose                                 | 75(15.2%)          | 25(9.5%)                           | 50(21.7%)                             | P<0.001 |
| Two-dose                                 | 120(24.4%)         | 54(20.6%)                          | 66(28.7%)                             | 0.037   |
| Three-dose                               | 5(1.0%)            | 4(1.5%)                            | 1(0.4%)                               | 0.378   |
| Severity on admission                    |                    |                                    |                                       |         |
| Mild                                     | 391(79.5%)         | 195(74.4%)                         | 196(85.2%)                            | 0.003   |
| Moderate                                 | 101(20.5%)         | 67(25.6%)                          | 34(14.8%)                             |         |
| Fever (temperature ≥ 37.5°C)             | 227(46.1%)         | 127(48.5%)                         | 100(43.5%)                            | 0.267   |
| Symptoms                                 |                    |                                    |                                       |         |
| Dyspnea                                  | 80(16.3%)          | 46(17.6%)                          | 34(14.8%)                             | 0.405   |
| Cough                                    | 239(48.6%)         | 130(49.6%)                         | 109(47.4%)                            | 0.622   |
| Diarrhea                                 | 18(3.7%)           | 11(4.2%)                           | 7(3.0%)                               | 0.496   |
| Sputum                                   | 98(19.9%)          | 50(19.1%)                          | 48(20.9%)                             | 0.621   |
| Sore throat                              | 112(22.8%)         | 52(19.8%)                          | 60(26.1%)                             | 0.100   |

|                        |            |           |           |       |
|------------------------|------------|-----------|-----------|-------|
| Fatigue                | 10(2.0%)   | 7(2.7%)   | 3(1.3%)   | 0.349 |
| Myalgia                | 108(22.0%) | 56(21.4%) | 52(22.6%) | 0.741 |
| Nausea                 | 3(0.6%)    | 2(0.8%)   | 1(0.4%)   | 1     |
| Pneumonia at admission | 106(21.5%) | 68(26.0%) | 38(16.5%) | 0.011 |

---

Supplementary table 2. Clinical outcomes before propensity matching score

| Variable                              | Total<br>(N = 492) | Use of<br>regdanvimab<br>(N = 262) | No use of<br>regdanvimab<br>(N = 230) | <i>P</i> -value |
|---------------------------------------|--------------------|------------------------------------|---------------------------------------|-----------------|
| Use of oxygen therapies               | 64(13.0%)          | 28(10.7%)                          | 36(15.7%)                             | 0.102           |
| Use of high flow nasal cannula        | 28(5.7%)           | 9(3.4%)                            | 19(8.3%)                              | 0.021           |
| Use of mechanical ventilation         | 4(0.8%)            | 1(0.4%)                            | 3(1.3%)                               | 0.344           |
| Use of intensive care units           | 23(4.7%)           | 8(3.1%)                            | 15(6.5%)                              | 0.250           |
| Worst severity during hospitalization |                    |                                    |                                       | <i>P</i> <0.001 |
| Asymptomatic                          | 2(0.4%)            | 2(0.8%)                            | 0(0.0%)                               |                 |
| Mild                                  | 256(52.0%)         | 107(40.8%)                         | 149(64.8%)                            |                 |
| Moderate                              | 165(33.5%)         | 121(46.2%)                         | 44(19.1%)                             |                 |
| Severe                                | 58(11.8%)          | 31(11.8%)                          | 27(11.7%)                             |                 |
| Critical                              | 11(2.2%)           | 1(0.4%)                            | 10(4.3%)                              |                 |
| Mortality                             | 9(1.8%)            | 1(0.4%)                            | 8(3.5%)                               | 0.015           |
| 30days Mortality                      | 8(1.6%)            | 0(0.0%)                            | 8(3.5%)                               | 0.002           |
| Severe/Critical or mortality          | 69(14.0%)          | 32(12.2%)                          | 37(16.1%)                             | 0.217           |
| Use of additional therapeutic agents  |                    |                                    |                                       |                 |
| Remdesivir                            | 50(10.2%)          | 25(9.5%)                           | 25(10.9%)                             | 0.627           |
| Dexamethasone                         | 66(13.4%)          | 35(13.4%)                          | 31(13.5%)                             | 0.969           |

Supplementary table 3. Propensity score matching standard mean difference

| Variable                             | Before PSM SMD | After PSM SMD |
|--------------------------------------|----------------|---------------|
| Distance                             | 0.5531         | 0.0127        |
| Age                                  |                |               |
| 50 <                                 | 0.0374         | 0.0219        |
| 50 ~ 59                              | 0.1226         | 0.0392        |
| 60 ~ 69                              | 0.0094         | -0.0853       |
| 70 ~ 79                              | -0.1599        | 0.0000        |
| 80 ≥                                 | -0.0900        | 0.0442        |
| Severity on admission                | 0.2469         | 0.0605        |
| Vaccination one dose                 | -0.4152        | 0.0000        |
| Vaccination two dose +<br>three dose | -0.1684        | 0.0127        |
